# Supplementary material for: UBE3C Promotes Growth and Metastasis of Renal Cell Carcinoma via Activating Wnt/β-Catenin Pathway
Source: PLoS One. 2015 Feb 6;10(2):e0115622. doi: 10.1371/journal.pone.0115622 (PMC4319909; doi:10.1371/journal.pone.0115622)
Supplement: S1 File — The evaluation of UBE3C expression was carried out through immunohistochemical staining. The high expression of UBE3C was labeled as 1 and the low expression as 0. Then the relationship between UBE3C expression and overall survival time was analyzed through Kaplan-Meier curves. (XLSX) [file pone.0115622.s001.xlsx]

## Sheet: Sheet1
patient No.	Time(months)	UBE3C low expression	UBE3C high expression
1	40		1
2	83		1
3	34		1
4	47		1
5	63		1
6	25		1
7	57		0
8	48		0
9	42		1
10	53		1
11	69		1
12	58		1
13	26		1
14	7		1
15	45		1
16	54		1
17	37		1
18	66		1
19	49		1
20	32		1
21	61	0
22	85	0
23	38	1
24	74	0
25	89	0
26	65	0
27	79	0
28	92	0
29	52	0
30	46	0
31	42	0
32	71	0
33	39	0
34	42	0
35	67	0
36	76	0
37	81	0
38	51	0
39	49	0
40	78	0
41	82	0
42	90	0
43	28	0
44	79	0
45	35	0
46	85	0
47	57	0
48	47	0
49	78	0
50	69	0
51	55	0
52	76	0
53	34	0
54	68	0
55	60	0
56	87	0
57	28	0
58	46	0
59	56	0
60	59	0
61	44	0
62	64	0
63	66	0
64	78	0
65	85	0
66	91	0
67	45	0
68	52	0
69	37	0
70	86	0
71	26	0
72	49	0
73	74	0
74	86	0
75	70		0
76	34		0
77	67		0
78	87		0
79	71		0
80	59		0
81	62		0
82	75		0
83	43		0
84	47		0
85	87		0
86	51		0
87	29		0
88	37		0
89	88		0
90	60	1
91	83	1
92	94	0
93	67	1
94	63	1
95	25	1
96	17		0
97	48		0
98	22		1
99	53		1
100	19		1
101	58		1
102	26		1
103	47		1
104	45		1
105	54		1
106	17		0
107	16		0
108	19		0
109	32		1
110	61	0
111	85	0
112	38	1
113	74	0
114	89	0
115	65	0
116	79	0
117	92	0
118	52	0
119	46	0
120	42	0
121	71	0
122	39	0
123	42	0
124	67	0
125	76	0
126	81	0
127	51	0
128	49	0
129	78	0
130	82	0
131	90	0
132	28	0
133	43	0
134	35	0
135	85	0
136	57	0
137	47	0
138	78	0
139	69	0
140	55	0
141	76	0
142	34	0
143	68	0
144	60	0
145	87	0
146	28	0
147	46	0
148	56	0
149	59	0
150	44	0
151	64	0
152	66	0
153	78	0
154	85	0
155	91	0
156	45	0
157	52	0
158	37	0
159	86	0
160	26	0
161	49	0
162	74	0
163	86	0
164	70		0
165	34		0
166	67		0
167	87		0
168	71		0
169	59		0
170	62		0
171	75		0
172	43		0
173	47		0
174	87		0
175	51		0
176	29		0
177	37		0
178	88		0
179	60	1
180	83	1
181	34	1
182	67	1
183	63	1
184	25	1
185	57		0
186	48		0
187	42		1
188	53		1
189	69		1
190	58		1
191	26		1
192	47		1
193	45		1
194	54		1
195	37		1
196	66		1
197	49		1
198	32		1
199	61		0
200	85		0
201	38		1
202	74		0
203	89		0
204	65		0
205	79		0
206	92		0
207	52		0
208	46		0
209	42		0
210	71	0
211	39	0
212	42	0
213	67	0
214	76	0
215	81	0
216	51	0
217	49	0
218	78	0
219	82	1
220	90	1
221	28	0
222	43		0
223	35		0
224	85		0
225	57		0
226	47		0
227	78		0
228	69		0
229	55		0
230	76		0
231	34		0
232	68		0
233	60	0
234	87	0
235	28	0
236	46	0
237	56	0
238	59	0
239	44	0
240	64	0
241	66	0
242	78	1
243	85	0
244	91	0
245	45	0
246	52	0
247	37	0
248	86	0
249	26	1
250	49	0
251	74	0
252	86	0
253	70		0
254	34		0
255	67		0
256	87		0
257	71		0
258	59		0
259	62		0
260	75		0
261	43		0
262	47		0
263	87		0
264	51		0
265	29		0
266	37		0
267	88		0
